# Supplementary figures and images for: Green Tea Polyphenol Epigallocatechin-3-Gallate Suppresses Collagen Production and Proliferation in Keloid Fibroblasts via Inhibition of the STAT3-Signaling Pathway
Source: Springer Nature journal article supplement (doi:10.1038/jid.2008.103), 2008-05-08

# Supplemental Data 1

**a**

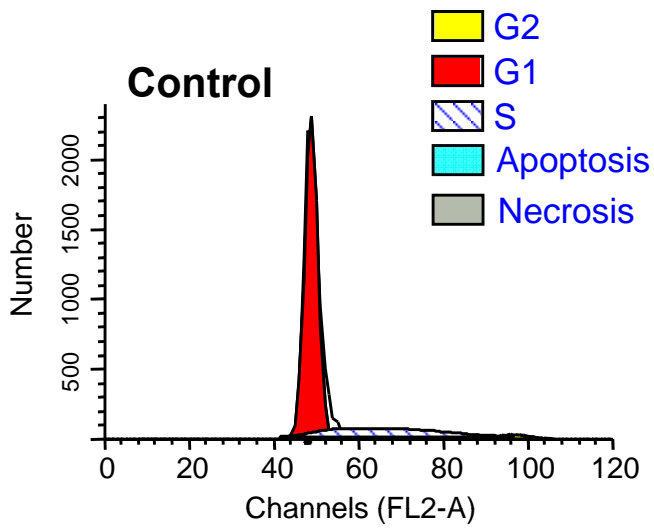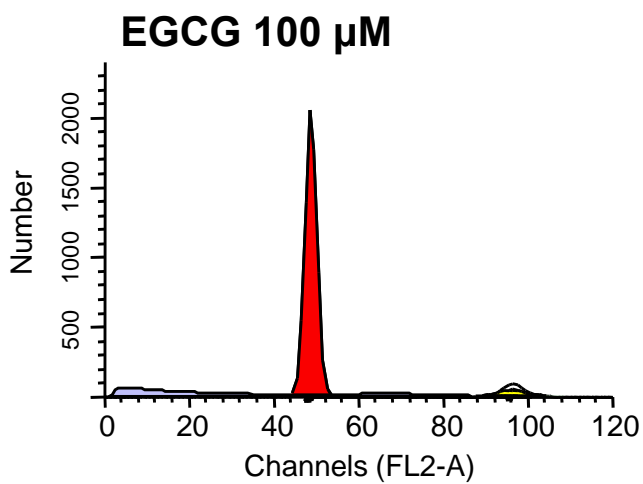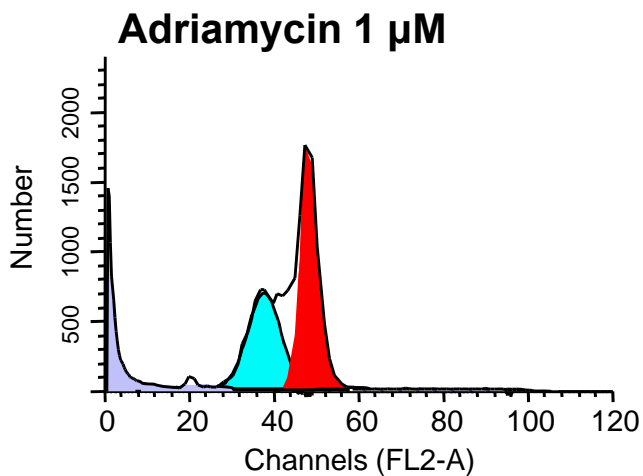

**b**

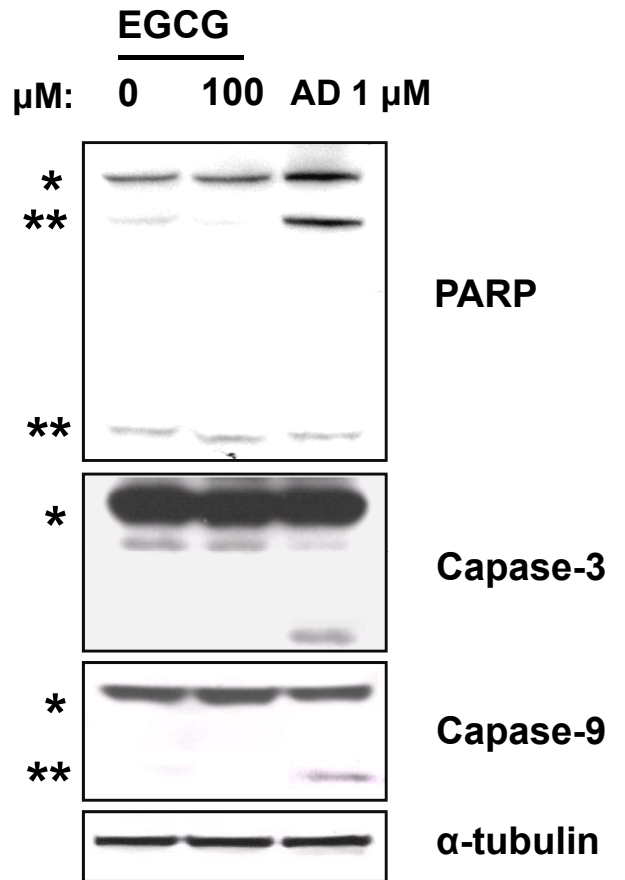

Supplement: jid2008103x1.pdf [file jid2008103x1.pdf]
